# Supplementary material for: Energy harvesting and wireless power transmission by a hybridized electromagnetic–triboelectric nanogenerator
Source: Royal Society of Chemistry journal article supplement (doi:10.1039/c9ee01245a), 2019-01-01
Supplement: c9ee01245a1.pdf [file c9ee01245a1.pdf]

## Supplementary Information

### Energy Harvesting and Wireless Power Transmission by a Hybridized Electromagnetic-triboelectric Nanogenerator

Yandong Chen,<sup>a, b</sup> Yu Cheng,<sup>a, b</sup> Yang Jie,<sup>a, b</sup> Xia Cao,<sup>\*a, b, c, d</sup> Ning Wang<sup>\*d</sup> and Zhong Lin Wang<sup>\*a, b, c, e</sup>

<sup>a</sup> Beijing Institute of Nanoenergy and Nanosystems, Chinese Academy of Sciences, National Center for Nanoscience and Technology(NCNST), Beijing 100083, China.

<sup>b</sup> School of Nanoscience and Technology, University of Chinese Academy of Sciences, Beijing 100049, China

<sup>c</sup> Center on Nanoenergy Research, School of Physical Science and Technology, Guangxi University.

<sup>d</sup> Research Center for Bioengineering and Sensing Technology, Beijing Key Laboratory for Bioengineering and Sensing Technology, School of Chemistry and Biological Engineering, Beijing Municipal Key Laboratory of New Energy Materials and Technologies, and Center for Green Innovation, School of Mathematics and Physics, University of Science and Technology Beijing, Beijing 100083, China.

<sup>e</sup> School of Materials Science and Engineering, Georgia Institute of Technology, Atlanta, Georgia 30332-0245, United States.

#### Corresponding Authors

caoxia@binn.cas.cn, wangning@ustb.edu.cn, zlwang@gatech.edu

Y.C., Y.C., Y.J. have contributed equally.

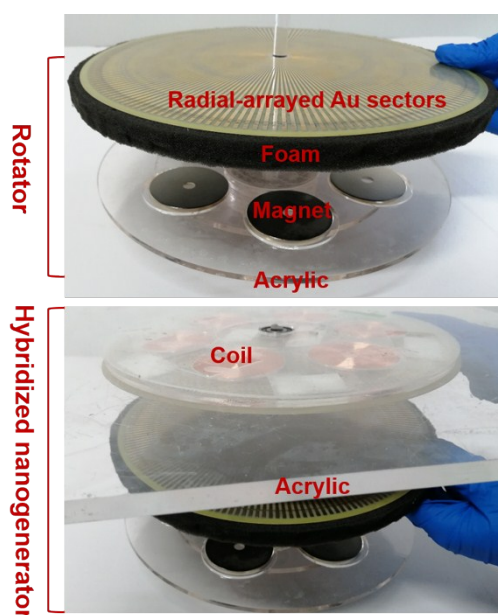

Figure S1. The corresponding photographs of the hybridized nanogenerator device. (a) The composition of the rotator. (b) Hybridized nanogenerator device for the experiment.

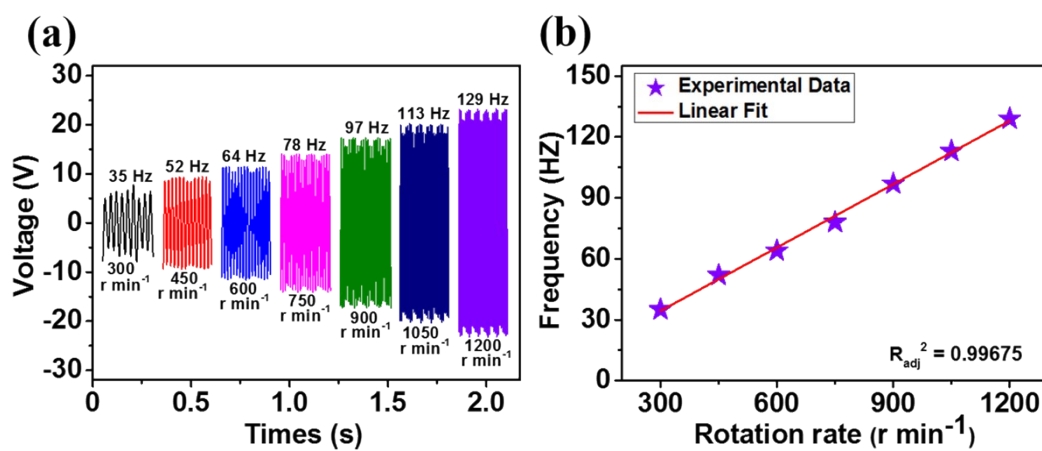

Figure S2. The relation between the rotational speed and the electrical output frequency of EMG. (a) Frequency response of open-circuit voltage with different speed. (b) Analysis for linear fitting results between rotational speed and working frequency of EMG.

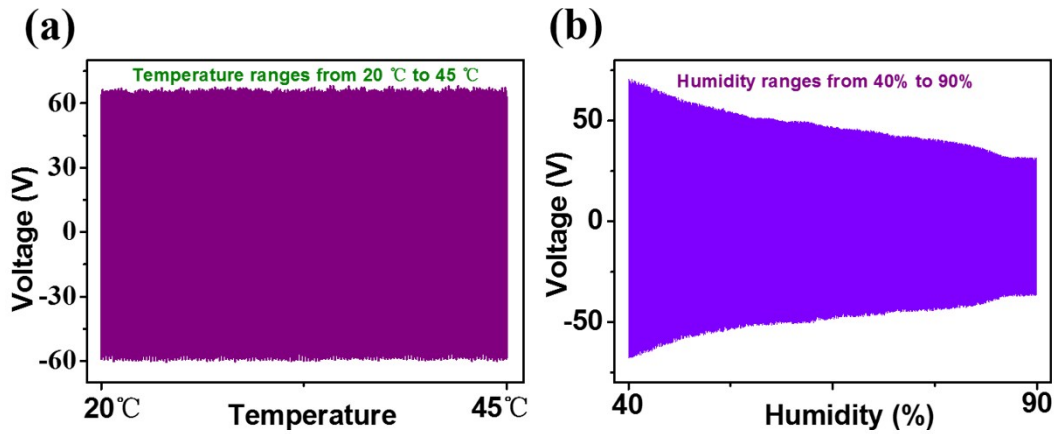

Figure S3. The output voltage of TENG variation with humidity and temperature. (a) The little effect of temperature on the output voltage. (b) The output voltage declines with the increase of humidity.

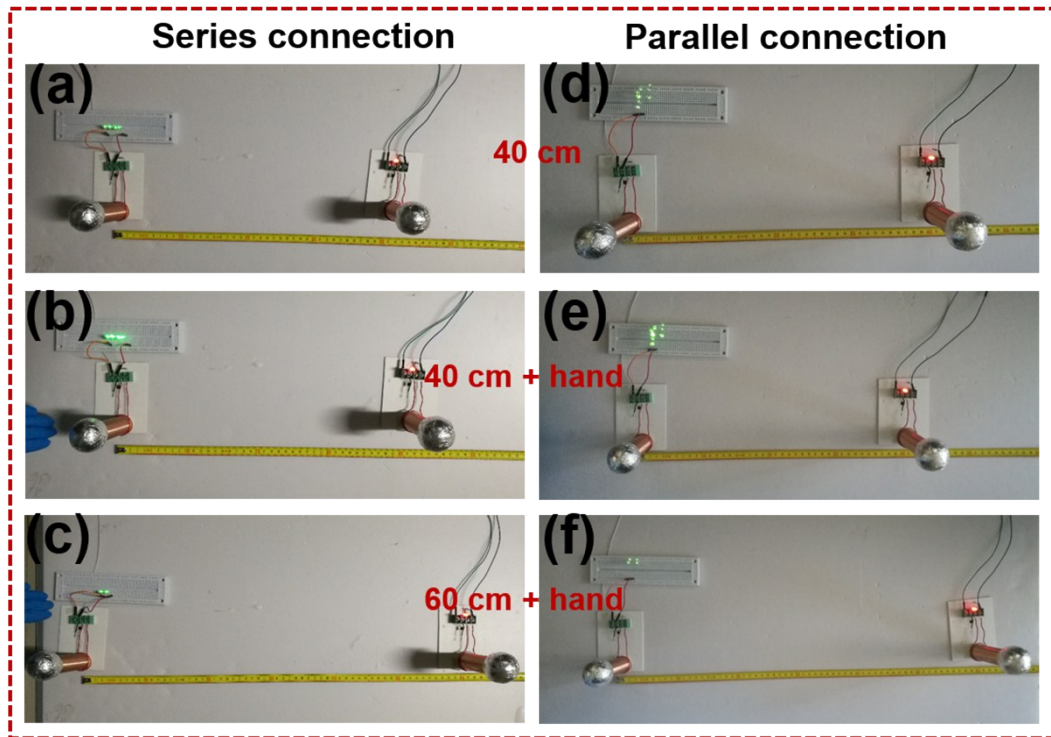

Figure S4. The transmission distance of the WPT system for driving LEDs in series and parallel. (a,d) 40 cm.(b,e) 40 cm with hand beside the receiver. (c,f) 60 cm with hand beside the receiver.

**Supporting Videos:**

Movie S1. A super capacitor bank was used to store the electric energy produced by the hybridized nanogenerator.

Movie S2. The receiver output of voltage at a distance of 80 cm.
