# Supplementary figures and images for: Energy harvesting and wireless power transmission by a hybridized electromagnetic–triboelectric nanogenerator
Source: Royal Society of Chemistry journal article supplement (doi:10.1039/c9ee01245a), 2019-01-01

**Rotator**

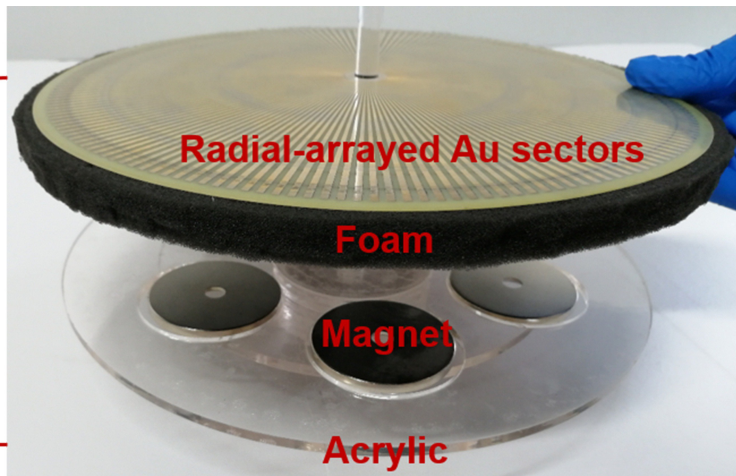

**Hybridized nanogenerator**

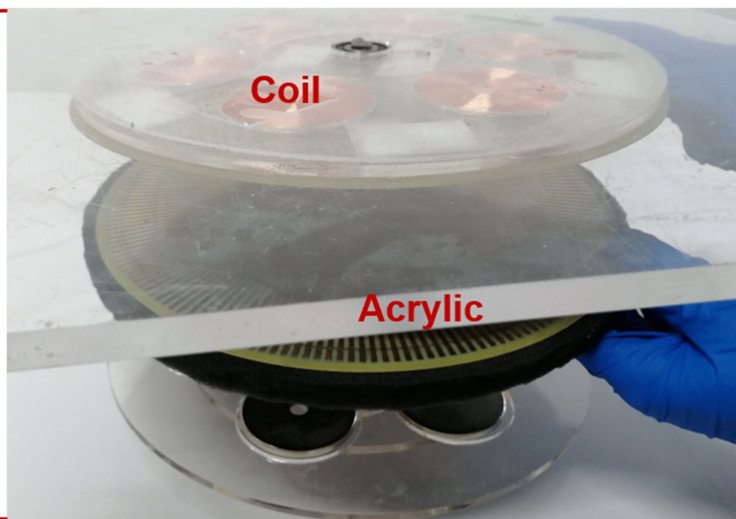

Supplement: c9ee01245a2.pdf [file c9ee01245a2.pdf]

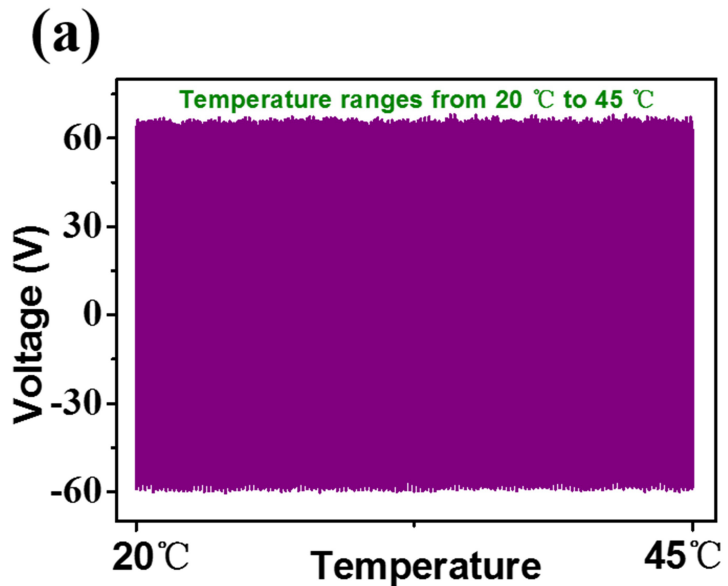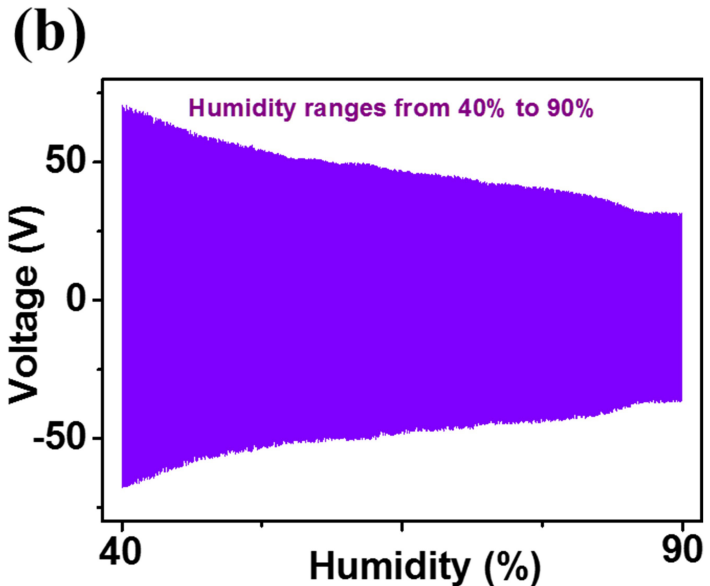

Supplement: c9ee01245a4.pdf [file c9ee01245a4.pdf]
